# Supplementary material for: Response of soil enzyme activity and bacterial community to black phosphorus nanosheets
Source: Royal Society of Chemistry journal article supplement (doi:10.1039/c9en00716d), 2020-01-01
Supplement: c9en00716d1.pdf [file c9en00716d1.pdf]

## Supplementary information

### Response of soil enzyme activities and bacteria communities to black phosphorus nanosheets

*Xuejiao Zhang<sup>1,#</sup>, Zhiqiang Xiong<sup>1,2,#</sup>, Siyu Zhang<sup>1</sup>, Yuan Ge<sup>3</sup>, Wei Ma<sup>1,2</sup>, Lei Yan<sup>4</sup>, Dengyu Li<sup>1,2</sup>, Dongsheng Wang<sup>1,2</sup>, Shuo Deng<sup>1,2</sup>, Qing Zhao<sup>1,\*</sup>, Weidong Wang<sup>4,\*</sup>, Baoshan Xing<sup>5,\*</sup>*

<sup>1</sup>Key Laboratory of Pollution Ecology and Environmental Engineering, Institute of Applied Ecology, Chinese Academy of Sciences, Shenyang 110016, China

<sup>2</sup>University of Chinese Academy of Sciences, Chinese Academy of Sciences, Beijing 100049, China

<sup>3</sup>State Key Laboratory of Urban and Regional Ecology, Research Center for Eco-Environmental Sciences, Chinese Academy of Sciences, Beijing 100085, China

<sup>4</sup>Heilongjiang Provincial Engineering Technology Research Center of Straws Resources Utilization, Heilongjiang Provincial Key Laboratory of Environmental Microbiology and Recycling of Agro-Waste in Cold Region, College of Life Science and Biotechnology, Heilongjiang Bayi Agricultural University, Daqing 163319, China

<sup>5</sup>Stockbridge School of Agriculture, University of Massachusetts, Amherst, MA 01003, USA

\*Corresponding Author: zhaoqing@iae.ac.cn (Qing Zhao), wwdcyy@126.com (Weidong Wang), bx@umass.edu (Baoshan Xing)

## **Materials and Methods**

### **Preparation of BP nanosheets**

BP nanosheets were prepared by the previously published method.<sup>1</sup> In brief, BP crystals (10 mg) were grinded into small pieces in the glove box using an agate mortar with a pestle. Then 10 mL oxygen-free Milli-pore water was added and the mixture was sonicated for 8 h with a ultrasonic cell disruption (JY 88-11N). Then the mixture was centrifuged at 800 rpm for 20 min to remove the un-exfoliated BP crystals. The concentration of BP nanosheets in the supernatant was determined to be  $1036 \pm 54$   $\mu\text{g/mL}$  by the inductively coupled plasma optical emission spectrometry (ICP-OES).

### **Soil collection and experimental design**

Black soil (10-20 cm) was collected from a state farm ( $48^{\circ}14'$  N,  $125^{\circ}11'$  E) in Qiqihar, Heilongjiang Province, with total carbon (TC)  $85.80 \pm 0.75$   $\text{g kg}^{-1}$ , total nitrogen (TN)  $122.50 \pm 2.23$   $\text{g kg}^{-1}$ , organic matter  $53.53 \pm 1.24$   $\text{g kg}^{-1}$ , pH  $6.37 \pm 0.04$ . Burozem (10-20 cm) was collected from a National Field Scientific Observation and Research Station ( $41^{\circ}31'$  N,  $123^{\circ}24'$  E) in Shenyang, Liaoning Province, with TC  $76.37 \pm 0.49$   $\text{g kg}^{-1}$ , TN  $61.40 \pm 5.88$   $\text{g kg}^{-1}$ , organic matter  $16.87 \pm 1.31$   $\text{g kg}^{-1}$ , and pH  $7.48 \pm 0.03$ . Detailed characterizations of soil physicochemical properties were shown in Table S1. Both soils were sieved ( $< 2$  mm) after removing small stones and plant roots and stored at  $4^{\circ}\text{C}$ .

The soils were pre-incubated at  $37^{\circ}\text{C}$  for one week and the BP suspensions were homogenized by bath sonication for 30 min before use. 100 mL suspensions of BP nanosheets ( $200$  and  $1036$   $\mu\text{g mL}^{-1}$ ) were sprayed to 2 kg soil samples to obtain the final BP concentrations of 10 and 50  $\text{mg kg}^{-1}$ , respectively. The same volume of sterilized water was used as a negative control. Then, the mixtures were manually stirred for 10 min to make BP nanosheets uniformly distributed in the soils. The soils were incubated at  $37^{\circ}\text{C}$  for 60 days, during which the soil moisture was maintained constantly at  $21.27 \pm 2.88$  wt% of the dry soil by regularly replenishing sterilized water. All the treatments were performed in triplicate.

## **Characterizations of soil properties**

Soil pH was measured with a pH meter (pH-22, HORIBA, Japan) with the soil to water ratio of 1:2.5. The TC and TN were determined by a multi N/C analyzer (N/C2100s, analytikjena, Germany). The soil organic matter was determined by potassium dichromate titration.<sup>2</sup> Soil texture measurement was performed by Agricultural industry standard: NY/T 1121.3-2006<sup>3</sup> which black soil represents clay and burozem represent silty clay.<sup>4</sup>

## **Interaction of BP nanosheets with soils**

The soil solution was prepared with the soil/water ratio of 1/50 and kept for 24 h at room temperature.<sup>5</sup> Then 10 mL of soil solution was mixed with 40 mL of BP suspension to obtain the final concentration of BP nanosheets at 50 mg kg<sup>-1</sup>. After incubation for 24 h at room temperature, the mixture was centrifuged at 4000 rpm for 5 min and the UV absorbance of the supernatant was scanned from 185 to 800 nm. The interaction between BP nanosheets and soils was indicated by the absorbance difference between supernatants of BP suspension with or without soils.

## **Interference of BP nanosheets with soil enzyme assays**

For the phenol-hypochlorite assay (to determine urease activity), 1 mL aqueous suspension of BP nanosheets (50 mg/mL) was mixed with 1 mL methylbenzene. After standing at room temperature for 15 min, 10 mL carbamide (10 wt%) and 20 mL citrate buffer (pH = 6.7) were added and the mixture was incubated at 37 °C for another 24 h. After filtration, 1 mL supernatant was mixed with ethanol solution of sodium phenol (4 mL, 1.35 mol L<sup>-1</sup>), sodium hypochlorite (3 mL, 0.9 wt%), and deionized water (42 mL). The same volume of sterile water without BP nanosheets was set up as control. After standing for 20 min at room temperature, the UV absorbance at 578 nm was record with a double beam UV-vis Spectrophotometer TU-1901 (PERSEE, China). All the experiments were performed in triplicate.

For the permanganate titration method (to determine catalase activity), 1 mL aqueous suspension of BP nanosheets (50 mg/mL) was mixed with 0.5 mL methylbenzene and the mixture was kept at 4 °C for 30 min. Then 25 mL cold H<sub>2</sub>O<sub>2</sub> solution (3 wt%) was added immediately and the mixture was incubated for 1 h at 4 °C, followed by the addition of 25 mL cold H<sub>2</sub>SO<sub>4</sub> (2 mol L<sup>-1</sup>). After filtration, 1 mL supernatant, 5 mL deionized water, and 5 mL H<sub>2</sub>SO<sub>4</sub> were mixed together and titrated with KMNO<sub>4</sub> solution (0.02 mol L<sup>-1</sup>). The same volume of sterile water without BP nanosheets was set up as control. The consumed volume of KMNO<sub>4</sub> solution was record. All the experiments were performed in triplicate.

Based on the data from Table S4 and S5, there was no significant difference between BP-treated and control groups ( $P > 0.05$ ), confirming that BP nanosheets did not interfere with the reagents of enzyme assays.

**Table S1** Physiochemical properties of soil samples during culturing with BP nanosheets.

| Sample      | pH          | TOC (mg/kg)  | TN (mg/kg)    | Organic matter (mg/kg) |
|-------------|-------------|--------------|---------------|------------------------|
| BL - 0 d    | 6.37 ± 0.04 | 85.80 ± 0.75 | 122.50 ± 2.23 | 62.30 ± 1.87           |
| BL-10 d - 0 | 6.21 ± 0.04 | 84.47 ± 1.63 | 131.87 ± 3.16 | 61.24 ± 0.90           |
| BL-10 d -50 | 6.03 ± 0.05 | 84.33 ± 2.80 | 116.90 ± 2.72 | 59.78 ± 1.05           |
| BL-60 d - 0 | 6.14 ± 0.07 | 82.53 ± 0.45 | 100.33 ± 1.62 | 61.82 ± 1.13           |
| BL-60 d -50 | 5.98 ± 0.05 | 89.87 ± 1.14 | 97.33 ± 8.01  | 62.94 ± 5.59           |
| BU - 0 d    | 7.48 ± 0.03 | 76.37 ± 0.49 | 61.40 ± 5.88  | 16.92 ± 1.41           |
| BU-10 d - 0 | 7.39 ± 0.03 | 76.73 ± 1.08 | 61.90 ± 1.65  | 15.36 ± 1.01           |
| BU-10 d -50 | 7.24 ± 0.04 | 76.43 ± 3.17 | 60.83 ± 1.10  | 15.59 ± 1.10           |
| BU-60 d - 0 | 7.33 ± 0.02 | 84.27 ± 3.07 | 53.80 ± 3.20  | 15.07 ± 0.95           |
| BU-60 d -50 | 7.16 ± 0.03 | 79.67 ± 2.80 | 51.17 ± 5.40  | 15.04 ± 0.81           |

Note: BL = black soil, BU = burozem; Means ± standard errors are presented (n = 3).

**Table S2.** Enzyme activity of untreated soils.

| Enzyme activity     | Black soil    | burozem       |
|---------------------|---------------|---------------|
| Urease              | 0.025 ± 0.002 | 0.044 ± 0.002 |
| Catalase            | 1.18 ± 0.07   | 1.49 ± 0.07   |
| Acid phosphatase    | 15.62 ± 0.45  | -             |
| Neutral phosphatase | -             | 1.61 ± 0.63   |

Soil urease activity [ $\text{mg NH}_4^+\text{-N g}^{-1}$  dry soil.24  $\text{h}^{-1}$ ], Soil catalase activity [ $\text{mL KMnO}_4$  (0.1 mol/L)  $\text{g}^{-1}$  dry soil. $\text{h}^{-1}$ ], Soil acid phosphatase activity [ $\text{mL Phenol}$  (1 nmol)  $\text{g}^{-1}$  dry soil.24  $\text{h}^{-1}$ ], Soil neutral phosphatase activity [ $\text{mL Phenol}$  (1 nmol)  $\text{g}^{-1}$  dry soil.24  $\text{h}^{-1}$ ]. Means ± standard errors are presented (n = 3).

**Table S3** Number of OTUs and diversity indexes of microbial communities treated with different concentrations of BP nanosheets.

| Sample     | OTUs | ACE                 | Chao 1             | Shannon         |
|------------|------|---------------------|--------------------|-----------------|
| BL-0 d     | 4738 | 3799.20 ± 483.38 a  | 3450.94 ± 427.04 a | 10.51 ± 0.15 a  |
| BL-10 d-0  | 4250 | 3249.00 ± 189.43 a  | 2976.58 ± 157.19 a | 10.29 ± 0.05 a  |
| BL-10 d-50 | 4080 | 3162.44 ± 8.76 a    | 2917.17 ± 5.73 a   | 10.24 ± 0.02 a  |
| BL-60 d-0  | 4157 | 3245.29 ± 154.71 a  | 2959.80 ± 235.56 a | 9.78 ± 0.93 a   |
| BL-60 d-50 | 4026 | 3203.30 ± 129.94 a  | 2939.78 ± 87.85 a  | 10.13 ± 0.17 a  |
| BU-0 d     | 4684 | 3863.63 ± 220.12 x  | 3596.87 ± 182.85 x | 10.89 ± 0.11 x  |
| BU-10 d-0  | 4539 | 3319.34 ± 388.20 xy | 3108.81 ± 157.43 x | 10.71 ± 0.09 x  |
| BU-10 d-50 | 4228 | 2627.29 ± 175.79 y  | 2591.44 ± 122.98 y | 10.75 ± 0.06 x  |
| BU-60 d-0  | 4003 | 2663.04 ± 364.29 y  | 2557.69 ± 270.69 y | 10.61 ± 0.08 x  |
| BU-60 d-50 | 4014 | 2557.00 ± 187.06 y  | 2520.66 ± 133.47 y | 10.74 ± 0.003 x |

Note: BL = black soil, BU = burozem. Letters (a, b) and (x, y) indicated significant difference among BL and BU, respectively, at the level of 0.05. Means ± standard errors are presented (n = 3).

Table S4 Absorbance at 578 nm.

| Group      | Absorbance    |
|------------|---------------|
| BP-treated | 0.035 ± 0.003 |
| Control    | 0.038 ± 0.001 |

Note: Means ± standard errors are presented (n = 3).



Table S5 Consumed volume of  $\text{KMnO}_4$  solution.

| Group      | Volume (mL)     |
|------------|-----------------|
| BP-treated | $7.47 \pm 0.58$ |
| Control    | $7.47 \pm 0.58$ |

Note: Means  $\pm$  standard errors are presented (n = 3).

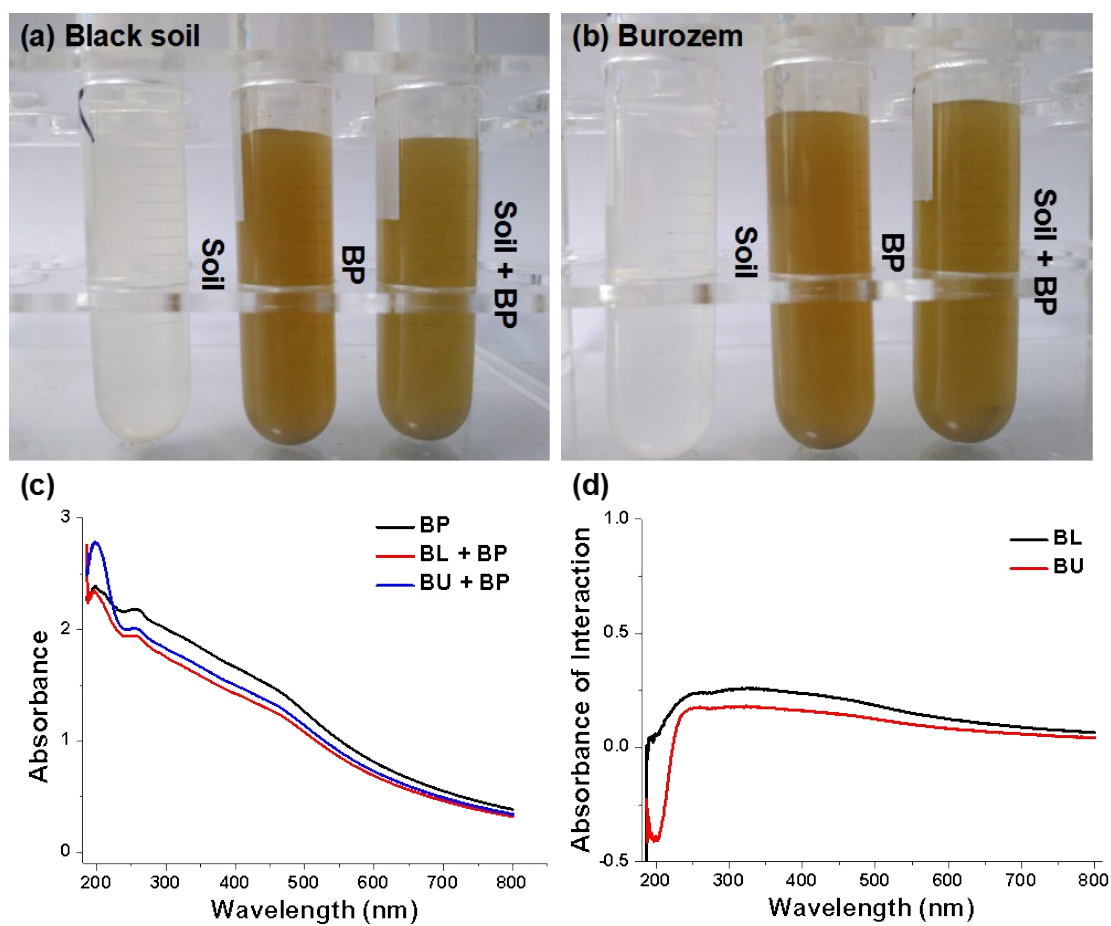

**Figure S1.** The photos of supernatants of soil, BP nanosheets, and their mixture for black soil (a) and burozem (b). (c) The UV absorbance of supernatants of BP nanosheets and mixture of BP and soil. (d) The absorbance of difference between supernatants of BP suspension with or without soils.

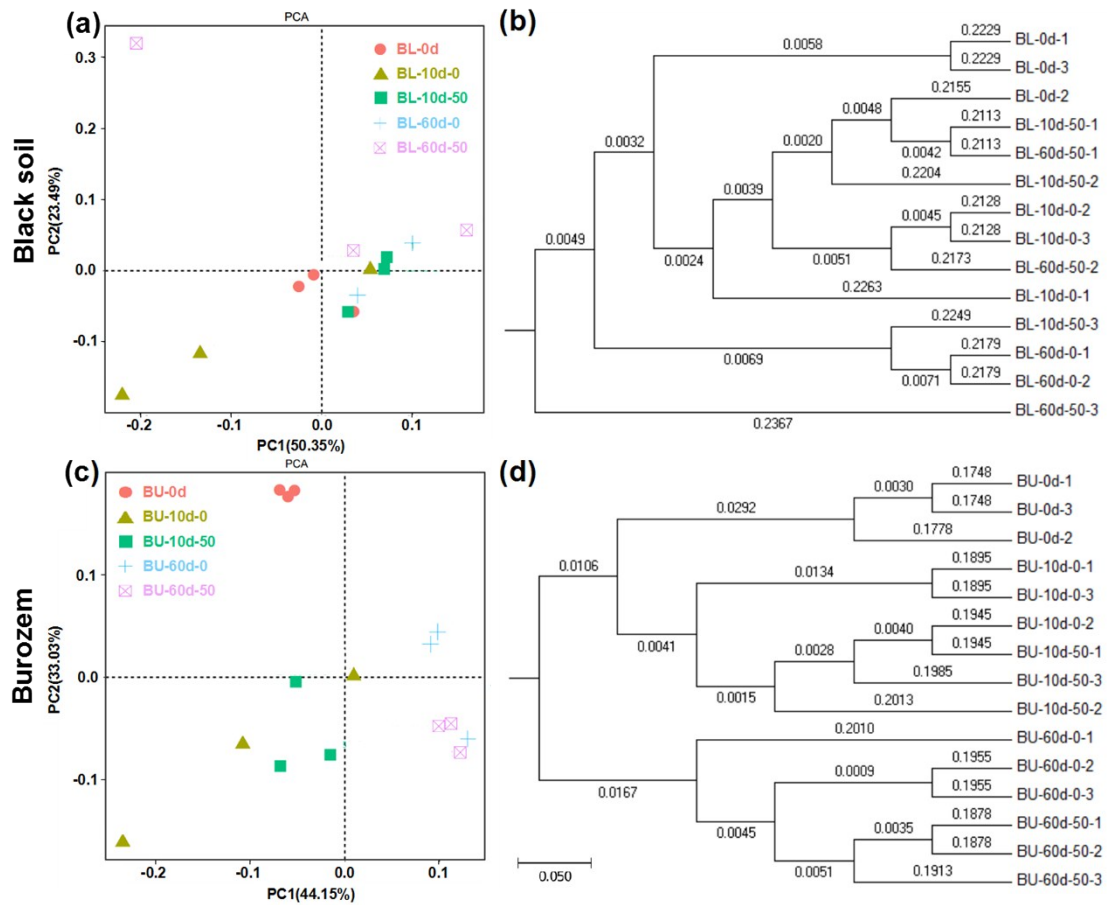

**Figure S2.** Results of principal component analysis (PCA) (a, c) and unweighted pair group method with arithmetic mean (UPGMA) (b, d) of bacteria communities in black soil (a, b) and burozem (c, d).

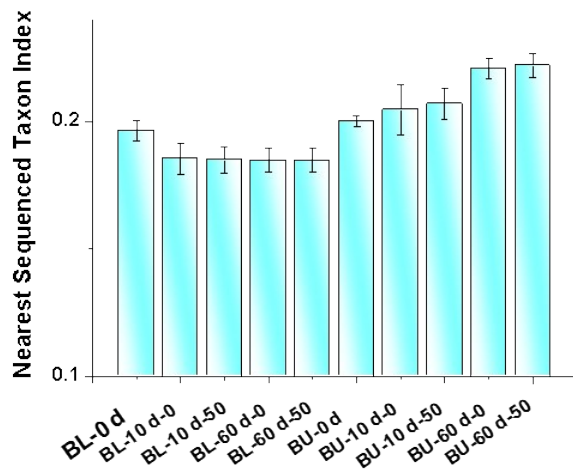

**Figure S3.** The nearest sequenced taxon index (NSTI) of different soil samples based on the PICRUSst method. Error bar indicates the standard deviation (n=3).

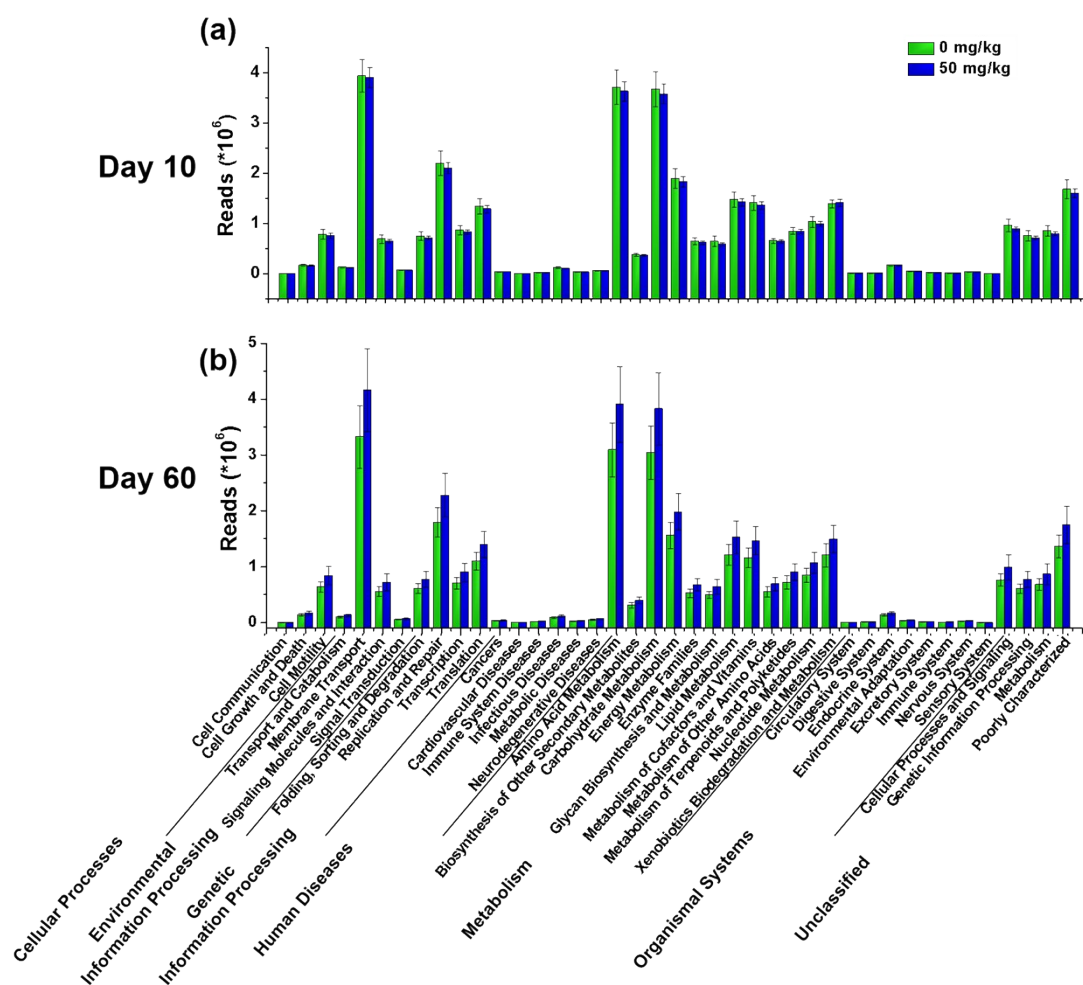

**Figure S4.** Predicted metagenomic base on 16S rRNA sequencing reads from black soil samples at day 10 (a) and day 60 (b) according to the pathway database of Kyoto Encyclopedia of Genes and Genomes (KEGG) at level 2. Error bar indicates the standard deviation (n=3).

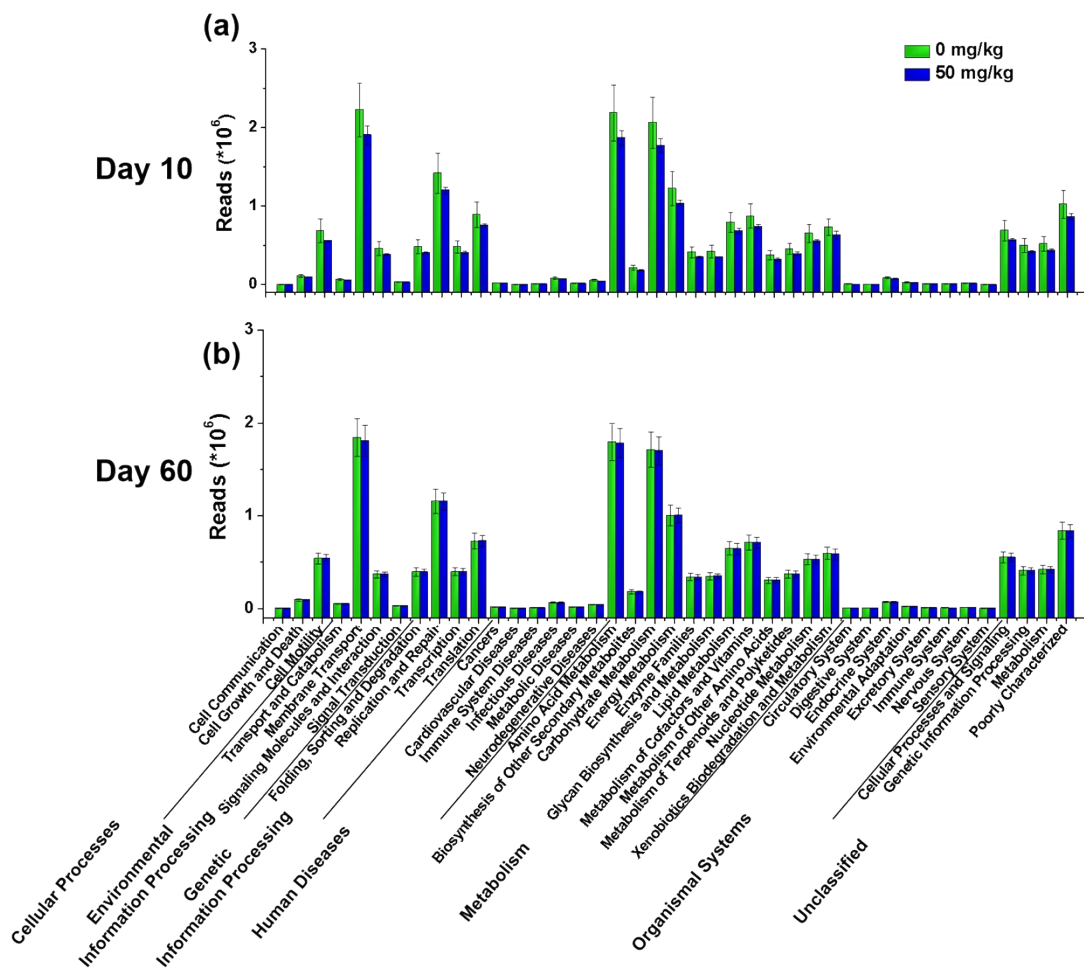

**Figure S5.** Predicted metagenomic base on 16S rRNA sequencing reads from burozem samples at day 10 (a) and day 60 (b) according to the pathway database of Kyoto Encyclopedia of Genes and Genomes (KEGG) at level 2. Error bar indicates the standard deviation (n=3).

## References

- 1 X. J. Zhang, Z. M. Zhang, S. Y. Zhang, D. Y. Li, W. Ma, C. X. Ma, F. C. Wu, Q. Zhao, Q. F. Yan and B. S. Xing, Size effect on the cytotoxicity of layered black phosphorus and underlying mechanisms, *Small*, 2017, **13**, 1701210.
- 2 Agricultural Industry Standards of the People's Republic of China, NY/T 85-1988, Method of determination of soil organic matter, <http://www.sdtdata.com/fx/fmrule/tsLibCard/108185.html>.
- 3 Agricultural Industry Standards of the People's Republic of China, NY/T 1121.3-2006, Soil Testing Part 3:Method for determination of soil mechanical composition, <http://www.sdtdata.com/fx/fmrule/tsLibCard/109228.html>.
- 4 United States Department of Agriculture (USDA), [https://www.nrcs.usda.gov/wps/portal/nrcs/detail/soils/survey/?cid=nrcs142p2\\_054167](https://www.nrcs.usda.gov/wps/portal/nrcs/detail/soils/survey/?cid=nrcs142p2_054167).
- 5 Q. Zhao, E. J. Petersen, G. Cornelis, X. L. Wang, X. Y. Guo, S. Tao, and B. S. Xing, Retention of <sup>14</sup>C-labeled multiwall carbon nanotubes by humic acid and polymers: Roles of macromolecule properties, *Carbon*, 2016, **99**, 229-237.
